# Supplementary material for: Spatial Uncertainty in Modeling Inhalation Exposure to Volatile Organic Compounds in Response to the Application of Consumer Spray Products
Source: MDPI journal article supplement (doi:10.3390/ijerph18105334), 2021-05-17
Supplement: s1 [file s1]

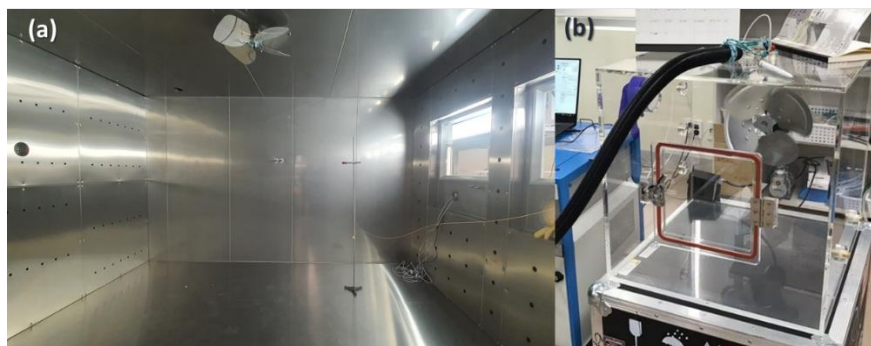

**Figure S1** (a) Interior of the room-size chamber and (b) the acrylic chamber used in this study.

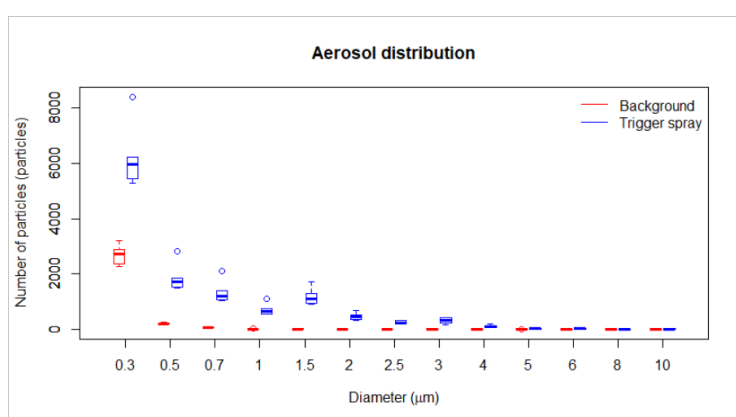

**Figure S2** Size distribution of aerosols from an application of a trigger spray and the background of the room-sized chamber.

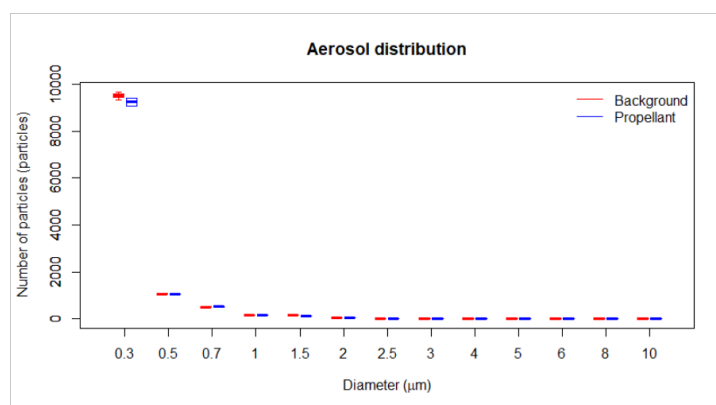

**Figure S3** Size distribution of aerosols from an application of a propellant spray and the background of the room-sized chamber.
